# Supplementary material for: Edar is a downstream target of beta-catenin and drives collagen accumulation in the mouse prostate
Source: PubMed Central journal article supplement (PMC6451354; doi:10.1242/bio.037945), 2019-02-11
Supplement: biolopen-8-037945-s1.pdf [file biolopen-8-037945-s1.pdf]

**Table S1.** PCR primers used to synthesize digoxigenin-labeled riboprobes.

[Click here to Download Table S1](#)
